# Supplementary material for: Prevalence of gastrointestinal parasites in bonnet macaque and possible consequences of their unmanaged relocations
Source: PLoS One. 2018 Nov 15;13(11):e0207495. doi: 10.1371/journal.pone.0207495 (PMC6237399; doi:10.1371/journal.pone.0207495)
Supplement: S3 Table — (XLSX) [file pone.0207495.s003.xlsx]

## Sheet: Species_Eggs
S3 Table. Data on endoparasites detected and their number in spatial samples of bonnet macaque.
Location	Parasites	Coccidia sp.	Entamoeba histolytica	Balantidium coli	Entamoeba coli	Giardia sp.	Total Protozoa	Spirurids	Strongyloides sp.	Trichuris sp.	Ancylostoma sp.	Bunostomum sp.	Haemonchus sp.	Diphylobothrium sp.	Moniezia sp.	Ascaris sp.	Hymenolepis nana	Oesophagostomum sp.	Toxocara sp.	Enterobius vermicularis	Trichostrongylus sp.	Taenia sp.	Dipylidium caninum	Total Helminth load	TOTAL no of parasites	Total number of species
AGHP1	N	0	0	0	0	0	0	0	0	0	0	0	0	0	0	0	0	0	0	0	0	0	0	0	0	0
AGHP1	N	0	0	0	0	0	0	0	0	0	0	0	0	0	0	0	0	0	0	0	0	0	0	0	0	0
AGHP1	Y	0	0	0	620	0	620	0	2	0	0	0	0	0	43	0	0	0	0	0	0	0	0	45	665	3
AGHP12	N	0	0	0	0	0	0	0	0	0	0	0	0	0	0	0	0	0	0	0	0	0	0	0	0	0
AGHP12	N	0	0	0	0	0	0	0	0	0	0	0	0	0	0	0	0	0	0	0	0	0	0	0	0	0
AGHP12	Y	1	0	0	0	0	1	0	0	0	0	0	0	0	0	0	0	0	0	0	0	0	0	0	1	1
AGHP12	Y	1	0	0	0	0	1	0	0	0	0	0	0	0	0	0	0	0	0	0	0	0	0	0	1	1
AGHP12	Y	0	0	0	0	0	0	0	0	0	0	0	0	0	18	0	0	0	0	0	0	0	0	18	18	1
AGHP12	Y	0	0	20	0	0	20	0	0	0	0	0	0	0	0	0	0	0	0	0	0	0	0	0	20	1
AGHP12	Y	0	0	0	0	0	0	0	0	0	0	0	0	0	20	0	0	0	0	0	0	0	0	20	20	1
AGHP12	Y	0	0	21	0	0	21	0	0	0	0	0	0	0	0	0	0	0	0	0	0	0	0	0	21	1
AGHP4	N	0	0	0	0	0	0	0	0	0	0	0	0	0	0	0	0	0	0	0	0	0	0	0	0	0
AGHP4	N	0	0	0	0	0	0	0	0	0	0	0	0	0	0	0	0	0	0	0	0	0	0	0	0	0
AGHP4	N	0	0	0	0	0	0	0	0	0	0	0	0	0	0	0	0	0	0	0	0	0	0	0	0	0
AGHP4	N	0	0	0	0	0	0	0	0	0	0	0	0	0	0	0	0	0	0	0	0	0	0	0	0	0
AGHP4	Y	0	0	0	0	0	0	0	0	0	0	0	0	0	0	0	0	0	0	4	0	0	0	4	4	1
AGHP4	Y	0	0	0	10	0	10	0	0	0	0	0	0	0	0	0	0	0	0	1	0	0	0	1	11	2
AGHP4	Y	0	0	0	0	0	0	0	0	0	0	0	0	0	0	1	0	0	0	0	0	0	0	1	1	1
AGHP4	N	0	0	0	0	0	0	0	0	0	0	0	0	0	0	0	0	0	0	0	0	0	0	0	0	0
AKATTI	N	0	0	0	0	0	0	0	0	0	0	0	0	0	0	0	0	0	0	0	0	0	0	0	0	0
AKATTI	N	0	0	0	0	0	0	0	0	0	0	0	0	0	0	0	0	0	0	0	0	0	0	0	0	0
AKATTI	N	0	0	0	0	0	0	0	0	0	0	0	0	0	0	0	0	0	0	0	0	0	0	0	0	0
AKATTI	N	0	0	0	0	0	0	0	0	0	0	0	0	0	0	0	0	0	0	0	0	0	0	0	0	0
AKATTI	Y	40	0	0	0	0	40	0	0	0	0	0	0	0	0	0	0	0	0	0	0	0	0	0	40	1
AKATTI	Y	42	0	0	0	0	42	0	0	0	0	0	0	0	0	0	0	0	0	0	0	0	0	0	42	1
AKATTI	Y	0	0	120	0	0	120	0	0	0	0	0	0	0	0	0	0	0	0	0	0	0	0	0	120	1
AKATTI	Y	0	0	123	0	0	123	0	0	0	0	0	0	0	0	0	0	0	0	0	0	0	0	0	123	1
FPOOTY	N	0	0	0	0	0	0	0	0	0	0	0	0	0	0	0	0	0	0	0	0	0	0	0	0	0
FPOOTY	N	0	0	0	0	0	0	0	0	0	0	0	0	0	0	0	0	0	0	0	0	0	0	0	0	0
FPOOTY	N	0	0	0	0	0	0	0	0	0	0	0	0	0	0	0	0	0	0	0	0	0	0	0	0	0
FPOOTY	N	0	0	0	0	0	0	0	0	0	0	0	0	0	0	0	0	0	0	0	0	0	0	0	0	0
FPOOTY	N	0	0	0	0	0	0	0	0	0	0	0	0	0	0	0	0	0	0	0	0	0	0	0	0	0
FPOOTY	N	0	0	0	0	0	0	0	0	0	0	0	0	0	0	0	0	0	0	0	0	0	0	0	0	0
FPOOTY	Y	0	0	0	0	0	0	0	0	0	0	0	0	0	0	2	0	0	0	0	0	0	0	2	2	1
FPOOTY	Y	0	0	0	0	0	0	0	0	0	0	0	0	0	0	2	0	0	0	0	0	0	0	2	2	1
FPOOTY	Y	0	0	0	0	0	0	0	0	0	0	0	0	0	0	3	0	0	0	0	0	0	0	3	3	1
FPOOTY	Y	0	0	0	0	0	0	0	0	0	0	0	0	0	0	3	0	0	0	0	0	0	0	3	3	1
FPOOTY	Y	0	0	0	0	0	0	0	0	0	0	0	0	0	0	10	0	0	0	0	0	0	0	10	10	1
FPOOTY	Y	0	0	0	0	0	0	0	0	0	0	0	0	0	0	11	0	0	0	0	0	0	0	11	11	1
IISC	N	0	0	0	0	0	0	0	0	0	0	0	0	0	0	0	0	0	0	0	0	0	0	0	0	0
IISC	N	0	0	0	0	0	0	0	0	0	0	0	0	0	0	0	0	0	0	0	0	0	0	0	0	0
IISC	Y	106	0	0	0	0	106	0	0	0	0	0	0	0	0	0	0	0	0	0	0	0	0	0	106	1
IISC	Y	110	0	0	0	0	110	0	0	0	0	0	0	0	0	0	0	0	0	0	0	0	0	0	110	1
IISC	Y	235	0	81	0	0	316	0	0	0	0	0	0	0	0	5	0	0	0	0	0	0	0	5	321	3
IISC	Y	240	0	80	0	0	320	0	0	0	0	0	0	0	0	4	0	0	0	0	0	0	0	4	324	3
JOGA	N	0	0	0	0	0	0	0	0	0	0	0	0	0	0	0	0	0	0	0	0	0	0	0	0	0
JOGA	Y	0	0	0	0	0	0	0	0	0	0	0	0	0	0	0	0	0	0	0	1	0	0	1	1	1
JOGA	Y	0	0	0	0	0	0	0	1	0	0	0	0	0	0	0	0	0	1	0	0	0	0	2	2	2
JOGA	Y	0	0	0	0	0	0	0	0	0	0	0	0	0	0	0	0	0	0	0	2	0	0	2	2	1
JOGA	Y	0	0	0	0	0	0	0	0	4	0	0	0	0	0	0	0	0	0	0	0	0	0	4	4	1
JOGA	Y	0	0	0	0	0	0	0	0	0	0	0	0	0	0	0	0	0	0	0	5	0	0	5	5	1
JOGA	Y	0	0	0	0	0	0	0	0	15	0	0	0	0	0	0	0	0	0	0	0	0	0	15	15	1
JOGA	Y	0	0	0	20	0	20	0	0	0	0	0	0	0	0	0	0	2	0	0	0	0	0	2	22	1
JOGA	Y	20	0	0	0	0	20	0	0	16	0	0	0	0	0	0	0	0	0	0	0	0	0	16	36	2
JOGA	Y	0	0	0	0	0	0	0	0	35	0	0	20	0	0	0	0	0	0	0	0	0	0	55	55	2
JOGA	Y	0	0	0	0	0	0	0	0	91	0	0	0	0	0	0	0	0	0	0	0	0	0	91	91	1
JOGA	Y	0	0	0	0	0	0	0	0	96	0	0	0	0	0	0	0	1	0	0	0	0	0	97	97	2
LVOOTY	N	0	0	0	0	0	0	0	0	0	0	0	0	0	0	0	0	0	0	0	0	0	0	0	0	0
LVOOTY	N	0	0	0	0	0	0	0	0	0	0	0	0	0	0	0	0	0	0	0	0	0	0	0	0	0
LVOOTY	N	0	0	0	0	0	0	0	0	0	0	0	0	0	0	0	0	0	0	0	0	0	0	0	0	0
LVOOTY	N	0	0	0	0	0	0	0	0	0	0	0	0	0	0	0	0	0	0	0	0	0	0	0	0	0
LVOOTY	Y	0	0	0	0	0	0	0	0	0	0	0	0	0	0	4	0	0	0	0	0	0	0	4	4	1
LVOOTY	N	0	0	0	0	0	0	0	0	0	0	0	0	0	0	0	0	0	0	0	0	0	0	0	0	0
LVOOTY	Y	0	0	0	0	0	0	0	0	0	0	0	0	0	0	44	0	0	0	0	0	0	0	44	44	1
LVOOTY	Y	0	0	0	0	0	0	0	0	0	0	0	0	0	0	4	0	0	0	0	0	0	0	4	4	1
LVOOTY	Y	0	0	40	0	0	40	0	0	0	0	0	0	0	0	0	0	0	0	0	10	0	0	10	50	2
LVOOTY	Y	0	0	0	0	0	0	0	0	0	0	20	0	0	0	0	0	0	0	0	0	0	0	20	20	1
LVOOTY	Y	0	0	0	0	0	0	0	0	0	0	0	0	0	0	0	0	43	5	0	0	40	0	88	88	3
LVOOTY	Y	0	40	0	0	0	40	0	0	0	0	0	0	0	0	2	0	0	0	0	0	80	0	82	122	3
LVOOTY	Y	0	320	0	0	0	320	0	0	0	0	0	0	0	0	0	0	0	0	0	0	0	0	0	320	1
METTUPALYAM	N	0	0	0	0	0	0	0	0	0	0	0	0	0	0	0	0	0	0	0	0	0	0	0	0	0
METTUPALYAM	N	0	0	0	0	0	0	0	0	0	0	0	0	0	0	0	0	0	0	0	0	0	0	0	0	0
METTUPALYAM	Y	0	0	80	0	240	320	0	12	0	0	0	0	0	0	0	0	0	0	0	8	0	0	20	340	4
METTUPALYAM	Y	0	0	85	0	231	316	0	18	0	0	0	0	0	0	0	0	0	0	0	8	0	0	26	342	4
METTUPALYAM	Y	0	0	0	541	0	541	0	0	0	0	0	0	0	0	80	0	0	0	4	0	0	0	84	625	3
METTUPALYAM	Y	0	0	0	560	0	560	0	0	0	0	0	0	0	0	88	0	0	0	4	0	0	0	92	652	4
NANDIHILL	N	0	0	0	0	0	0	0	0	0	0	0	0	0	0	0	0	0	0	0	0	0	0	0	0	0
NANDIHILL	N	0	0	0	0	0	0	0	0	0	0	0	0	0	0	0	0	0	0	0	0	0	0	0	0	0
NANDIHILL	Y	0	0	0	0	0	0	0	0	0	0	0	0	0	0	0	0	0	0	0	1	0	0	1	1	1
NANDIHILL	Y	0	0	0	0	0	0	0	0	0	0	0	0	0	0	0	0	0	0	0	2	0	0	2	2	1
NANDIHILL	Y	0	0	0	0	0	0	0	0	0	0	0	0	0	0	0	0	0	0	0	22	17	0	39	39	2
NANDIHILL	Y	0	0	0	0	0	0	0	0	0	0	0	0	0	0	0	0	0	0	0	0	40	0	40	40	1
NANDIHILL	Y	0	0	0	0	0	0	0	0	0	0	0	0	0	0	0	0	0	0	0	20	20	0	40	40	2
NANDIHILL	Y	0	0	20	0	0	20	0	0	0	0	0	0	0	20	7	0	0	0	0	0	0	0	27	47	3
NANDIHILL	Y	0	0	21	0	0	21	0	0	0	0	0	0	0	16	10	0	0	0	0	0	0	0	26	47	3
NANDIHILL	Y	0	0	0	0	0	0	0	0	0	0	0	0	0	0	0	0	0	0	0	0	48	0	48	48	1
PACHAMEMT	Y	0	0	0	0	0	0	0	0	0	0	2	0	0	0	2	0	0	0	0	0	0	0	4	4	2
PACHAMEMT	Y	0	0	0	0	0	0	0	0	0	0	4	0	0	0	1	0	0	0	0	0	0	0	5	5	2
PACHAMEMT	Y	20	0	0	0	0	20	0	0	0	0	0	0	0	40	1	3	0	0	0	0	0	0	44	64	4
PACHAMEMT	Y	23	0	0	0	0	23	0	0	0	0	0	0	0	38	2	4	0	0	0	0	0	0	44	67	4
PACHAMEMT	Y	60	0	0	0	0	60	36	55	0	32	101	0	0	0	1	0	0	0	0	3	40	0	268	328	8
PACHAMEMT	Y	70	0	0	0	0	70	34	54	0	30	111	0	0	0	2	0	0	0	0	3	35	0	269	339	8
PERAMBIKULAM	Y	0	0	0	0	0	0	0	0	0	0	0	0	0	0	0	0	0	0	23	0	0	0	23	23	1
PERAMBIKULAM	Y	0	0	0	0	0	0	0	0	0	0	0	0	0	0	0	0	0	0	28	0	0	0	28	28	1
SEETHANADI	N	0	0	0	0	0	0	0	0	0	0	0	0	0	0	0	0	0	0	0	0	0	0	0	0	0
SEETHANADI	N	0	0	0	0	0	0	0	0	0	0	0	0	0	0	0	0	0	0	0	0	0	0	0	0	0
SEETHANADI	N	0	0	0	0	0	0	0	0	0	0	0	0	0	0	0	0	0	0	0	0	0	0	0	0	0
SEETHANADI	N	0	0	0	0	0	0	0	0	0	0	0	0	0	0	0	0	0	0	0	0	0	0	0	0	0
SEETHANADI	N	0	0	0	0	0	0	0	0	0	0	0	0	0	0	0	0	0	0	0	0	0	0	0	0	0
SEETHANADI	N	0	0	0	0	0	0	0	0	0	0	0	0	0	0	0	0	0	0	0	0	0	0	0	0	0
SEETHANADI	Y	0	0	0	0	0	0	0	0	0	0	0	0	0	0	1	0	0	0	0	0	0	0	1	1	1
SEETHANADI	Y	0	0	0	0	0	0	0	0	0	0	0	0	0	0	1	0	0	0	0	0	0	0	1	1	1
SEETHANADI	Y	0	0	0	0	0	0	0	0	0	0	0	0	0	0	1	0	0	0	0	0	0	0	1	1	1
SEETHANADI	Y	0	0	0	0	0	0	0	0	0	0	0	0	0	0	2	0	0	0	0	0	0	0	2	2	1
SEETHANADI	Y	0	0	0	0	0	0	0	0	0	0	0	0	0	0	10	0	0	0	0	0	0	0	10	10	1
SEETHANADI	Y	0	0	0	0	0	0	0	0	0	0	0	0	0	0	13	0	0	0	0	0	0	0	13	13	1
SEETHANADI	Y	0	0	60	0	0	60	0	0	0	0	0	0	0	0	5	0	0	0	0	0	0	0	5	65	2
SEETHANADI	Y	0	0	70	0	0	70	0	0	0	0	0	0	0	0	4	0	0	0	0	0	0	0	4	74	2
SEETHANADI CAMP	N	0	0	0	0	0	0	0	0	0	0	0	0	0	0	0	0	0	0	0	0	0	0	0	0	0
SEETHANADI CAMP	N	0	0	0	0	0	0	0	0	0	0	0	0	0	0	0	0	0	0	0	0	0	0	0	0	0
SEETHANADI CAMP	Y	0	0	0	0	0	0	0	20	0	0	0	0	0	0	0	0	0	0	0	0	0	0	20	20	1
SEETHANADI CAMP	Y	0	0	0	0	0	0	0	0	0	0	0	0	0	0	0	0	0	0	0	20	0	0	20	20	1
SEETHANADI CAMP	Y	0	0	0	0	0	0	0	22	0	0	0	0	0	0	0	0	0	0	0	0	0	0	22	22	1
SEETHANADI CAMP	Y	0	0	0	0	0	0	0	0	0	0	0	0	0	0	22	0	0	0	0	0	0	0	22	22	1
SEETHANADI CAMP	Y	0	0	0	0	0	0	0	23	0	0	0	0	0	0	0	0	0	0	0	0	0	0	23	23	1
SEETHANADI CAMP	Y	0	0	0	0	0	0	0	0	0	0	0	0	0	0	0	0	0	0	0	23	0	0	23	23	1
SEETHANADI CAMP	Y	0	0	0	0	0	0	0	23	0	0	0	0	0	0	0	0	0	0	0	0	0	0	23	23	1
SEETHANADI CAMP	Y	0	0	0	0	0	0	0	0	0	0	0	0	0	0	26	0	0	0	0	0	0	0	26	26	1
SEETHANADI CAMP	Y	0	0	0	0	0	0	0	26	0	0	0	0	0	0	0	0	0	0	0	0	0	0	26	26	1
SEETHANADI CAMP	Y	0	0	0	0	0	0	0	30	0	0	0	0	0	0	0	0	0	0	0	0	0	0	30	30	1
SEETHANADI CAMP	Y	0	0	0	0	0	0	0	0	0	0	0	0	0	0	40	0	0	0	0	0	0	0	40	40	1
SEETHANADI CAMP	Y	0	0	0	0	0	0	0	0	0	0	0	0	0	0	45	0	0	0	0	0	0	0	45	45	1
SEETHANADI CAMP	Y	0	0	0	0	0	0	0	0	0	0	0	0	0	0	0	0	60	0	0	0	0	0	60	60	1
SEETHANADI CAMP	Y	0	0	0	0	0	0	0	0	0	0	0	0	0	0	0	0	64	0	0	0	0	0	64	64	1
SEETHANADI CAMP	Y	0	0	0	0	0	0	0	85	0	0	0	0	0	0	0	0	0	0	0	0	0	0	85	85	1
SEETHANADI CAMP	Y	0	0	0	0	0	0	0	91	0	0	0	0	0	0	0	0	0	0	0	0	0	0	91	91	1
SSGAGANACHUKKI	Y	0	0	0	0	0	0	0	0	0	0	0	0	0	0	1	0	0	0	0	0	0	0	1	1	1
SSGAGANACHUKKI	Y	0	0	0	0	0	0	0	0	0	0	0	0	0	0	3	0	0	0	0	0	0	0	3	3	1
SSGAGANACHUKKI	Y	0	0	0	0	0	0	0	4	0	0	0	0	40	20	2	0	0	0	0	0	0	0	66	66	4
SSGAGANACHUKKI	Y	0	0	0	0	0	0	0	6	0	0	0	0	38	21	5	0	0	0	0	0	0	0	70	70	4
SSSATTEGALA	Y	1	0	0	0	0	1	0	0	0	0	0	0	0	0	0	0	0	0	0	0	0	0	0	1	1
SSSATTEGALA	Y	0	0	0	0	0	0	0	1	0	0	0	0	20	0	0	0	0	0	0	0	0	0	21	21	2
SSSATTEGALA	Y	40	0	0	0	0	40	0	0	0	0	0	0	0	0	0	0	0	0	0	0	0	0	0	40	1
SSSATTEGALA	Y	0	0	0	0	0	0	0	0	0	0	0	20	0	0	0	0	0	20	0	0	0	0	40	40	2
SSSATTEGALA	Y	0	0	0	0	0	0	0	0	0	0	0	0	0	0	0	0	0	0	0	0	0	140	140	140	1
TRITEMPLE	N	0	0	0	0	0	0	0	0	0	0	0	0	0	0	0	0	0	0	0	0	0	0	0	0	0
TRITEMPLE	N	0	0	0	0	0	0	0	0	0	0	0	0	0	0	0	0	0	0	0	0	0	0	0	0	0
TRITEMPLE	Y	0	0	0	0	0	0	0	4	0	0	20	0	0	0	0	0	0	0	0	0	0	0	24	24	2
TRITEMPLE	Y	0	0	0	0	0	0	0	3	0	0	23	0	0	0	0	0	0	0	0	0	0	0	26	26	2
VALPARAI	N	0	0	0	0	0	0	0	0	0	0	0	0	0	0	0	0	0	0	0	0	0	0	0	0	0
VALPARAI	N	0	0	0	0	0	0	0	0	0	0	0	0	0	0	0	0	0	0	0	0	0	0	0	0	0
VANAMMATEMPLE	N	0	0	0	0	0	0	0	0	0	0	0	0	0	0	0	0	0	0	0	0	0	0	0	0	0
VANAMMATEMPLE	N	0	0	0	0	0	0	0	0	0	0	0	0	0	0	0	0	0	0	0	0	0	0	0	0	0
VANAMMATEMPLE	N	0	0	0	0	0	0	0	0	0	0	0	0	0	0	0	0	0	0	0	0	0	0	0	0	0
VANAMMATEMPLE	N	0	0	0	0	0	0	0	0	0	0	0	0	0	0	0	0	0	0	0	0	0	0	0	0	0
VANAMMATEMPLE	N	0	0	0	0	0	0	0	0	0	0	0	0	0	0	0	0	0	0	0	0	0	0	0	0	0
VANAMMATEMPLE	N	0	0	0	0	0	0	0	0	0	0	0	0	0	0	0	0	0	0	0	0	0	0	0	0	0
VANAMMATEMPLE	N	0	0	0	0	0	0	0	0	0	0	0	0	0	0	0	0	0	0	0	0	0	0	0	0	0
VANAMMATEMPLE	N	0	0	0	0	0	0	0	0	0	0	0	0	0	0	0	0	0	0	0	0	0	0	0	0	0
VANAMMATEMPLE	Y	20	0	0	0	0	20	0	1	0	0	0	0	0	0	0	0	0	0	0	0	0	0	1	21	2
VANAMMATEMPLE	Y	21	0	0	0	0	21	0	5	0	0	0	0	0	0	0	0	0	0	0	0	0	0	5	26	2
VANAMMATEMPLE	Y	160	0	0	0	0	160	0	0	0	0	0	0	0	0	0	0	0	0	0	0	0	0	0	160	1
VANAMMATEMPLE	Y	171	0	0	0	0	171	0	0	0	0	0	0	0	0	0	0	0	0	0	0	0	0	0	171	1
YERCAAD	N	0	0	0	0	0	0	0	0	0	0	0	0	0	0	0	0	0	0	0	0	0	0	0	0	0
YERCAAD	N	0	0	0	0	0	0	0	0	0	0	0	0	0	0	0	0	0	0	0	0	0	0	0	0	0
YERCAAD	N	0	0	0	0	0	0	0	0	0	0	0	0	0	0	0	0	0	0	0	0	0	0	0	0	0
YERCAAD	Y	0	0	0	0	0	0	0	0	0	0	0	0	0	0	3	0	0	0	0	0	0	0	3	3	1
YERCAAD	Y	0	0	10	0	0	10	0	0	0	0	0	0	0	0	0	0	0	0	0	0	0	0	0	10	1
YERCAAD	Y	20	0	0	0	0	20	0	0	0	0	0	0	0	0	10	0	0	0	0	0	0	0	10	30	2
YERCAAD	Y	0	0	0	0	0	0	0	0	0	0	0	0	0	0	0	120	0	0	0	0	0	0	120	120	1
YERCAAD	Y	20	20	0	0	0	40	0	0	0	0	0	0	360	0	0	0	0	0	0	0	0	0	360	400	3
