# Supplementary material for: Prevalence of gastrointestinal parasites in bonnet macaque and possible consequences of their unmanaged relocations
Source: PLoS One. 2018 Nov 15;13(11):e0207495. doi: 10.1371/journal.pone.0207495 (PMC6237399; doi:10.1371/journal.pone.0207495)
Supplement: S4 Table — (XLSX) [file pone.0207495.s004.xlsx]

## Sheet: helminth protozoa
S4 Table. Data on endoparasites detected and their number in temporal samples of bonnet macaque group in Chiksuli, Central Western Ghats
Date	Season	Age and Sex	Coccidia sp.	Balantidium coli	Entamoeba coli	Giardia sp.	Strongyle sp.	Strongyloides sp.	Spirurids	Trichuris sp.	Ancylostoma sp.	Bunostomum sp.	Haemonchus sp.	Moniezia sp.	Ascaris sp.	Hymenolepis nana	Oesophagostomum sp.	Toxocara sp.	Enterobius vermicularis	Trichostrongylus sp.	Taenia sp.	Metastrongylus sp.	Nematodirus sp.	Total number of helminths	Total number of protozoa	TOTAL number of parasites
April	Summer	ADM	0	0	0	0	0	60	0	60	0	0	0	0	0	0	20	0	0	0	0	0	0	140	0	140
April	Summer	ADM	0	0	0	0	0	23	0	0	0	0	0	0	0	20	0	0	0	0	0	0	0	43	0	43
April	Summer	ADM	0	60	0	0	0	0	0	64	0	0	0	0	23	0	0	0	0	20	0	0	0	107	60	167
April	Summer	ADF	26	0	0	0	0	0	0	21	0	0	0	0	20	0	1	0	0	0	0	0	0	42	26	68
April	Summer	IMM	0	0	1	0	0	0	0	251	0	0	0	0	0	0	20	0	0	0	0	0	0	271	1	272
April	Summer	ADF	0	0	0	0	0	24	0	35	0	0	0	0	0	0	0	0	0	0	0	0	0	59	0	59
April	Summer	ADF	0	0	0	0	0	0	0	0	0	0	0	0	0	0	0	0	0	0	0	0	0	0	0	0
April	Summer	ADM	0	0	0	0	0	0	0	0	0	0	0	0	0	0	0	0	0	0	0	0	0	0	0	0
April	Summer	ADM	0	0	0	0	0	0	0	0	0	0	0	0	0	0	20	0	0	0	0	0	0	20	0	20
April	Summer	ADF	0	0	0	0	0	0	0	1	0	0	0	0	1	0	1	0	0	0	0	0	0	3	0	3
April	Summer	IMM	0	55	0	0	0	21	0	0	0	0	0	0	0	0	0	0	0	0	0	0	0	21	55	76
April	Summer	ADF	0	0	0	0	0	1	0	0	0	0	0	0	0	0	0	0	0	0	0	0	0	1	0	1
April	Summer	ADM	0	0	0	0	0	840	0	21	0	0	0	0	0	0	121	0	0	0	0	0	0	982	0	982
April	Summer	IMM	0	0	0	0	0	283	1400	0	0	0	0	0	0	0	122	0	0	0	0	0	0	1805	0	1805
April	Summer	ADF	0	0	0	0	0	0	0	0	0	0	0	0	0	0	3	0	0	0	0	0	0	3	0	3
April	Summer	ADF	0	0	0	0	0	121	0	0	0	0	0	0	0	0	71	0	0	0	0	0	0	192	0	192
April	Summer	ADM	0	0	0	0	0	20	0	0	0	0	0	0	0	0	4	0	0	0	0	0	0	24	0	24
April	Summer	ADF	0	0	0	0	0	0	0	0	0	0	0	0	0	0	2	0	0	0	0	0	0	2	0	2
April	Summer	ADM	0	0	0	0	0	23	0	0	0	0	0	0	0	0	0	0	20	40	0	0	0	83	0	83
April	Summer	ADF	0	0	0	0	0	0	0	0	0	0	0	0	0	0	0	0	0	0	0	20	0	20	0	20
April	Summer	IMM	0	0	0	0	0	21	0	225	0	0	0	0	0	0	60	0	0	0	0	0	0	306	0	306
April	Summer	ADF	0	0	0	0	0	0	0	100	0	0	0	20	1	0	26	0	0	0	0	0	0	147	0	147
April	Summer	ADM	0	0	0	0	0	0	0	0	0	0	0	0	0	0	0	0	0	0	0	0	0	0	0	0
April	Summer	ADM	0	0	0	0	0	0	0	0	0	0	0	0	0	0	0	0	0	0	0	0	0	0	0	0
April	Summer	ADF	0	0	0	0	0	0	0	0	0	0	0	0	4	0	22	0	0	0	0	0	0	26	0	26
April	Summer	ADF	0	0	0	0	0	22	0	0	0	0	0	0	0	0	21	0	0	0	0	0	0	43	0	43
April	Summer	ADF	0	0	0	0	0	0	0	0	0	0	0	0	0	0	0	0	0	0	0	0	0	0	0	0
April	Summer	ADF	0	0	0	0	0	1	0	0	0	0	0	0	0	0	0	0	0	0	0	0	0	1	0	1
April	Summer	ADF	0	0	0	0	0	0	0	0	0	0	0	0	0	0	0	0	0	0	0	0	0	0	0	0
April	Summer	ADM	0	0	0	0	0	0	0	0	0	0	0	0	0	0	0	0	0	0	0	0	0	0	0	0
May	Summer	ADF	0	0	0	0	0	0	0	0	0	20	0	0	0	0	0	0	0	0	0	0	0	20	0	20
May	Summer	ADM	0	0	0	0	0	1	0	0	0	0	0	0	24	0	0	0	0	0	0	0	0	25	0	25
May	Summer	ADF	0	0	0	0	0	0	0	0	0	0	0	0	0	0	0	0	0	0	0	0	0	0	0	0
May	Summer	ADF	0	0	0	0	0	0	0	0	0	0	0	0	0	0	0	0	0	0	0	0	0	0	0	0
May	Summer	ADM	0	0	0	0	0	40	0	0	0	0	0	0	0	0	0	0	0	0	0	0	0	40	0	40
May	Summer	ADF	0	0	0	0	0	0	0	0	0	0	0	0	0	0	0	0	0	0	0	0	0	0	0	0
May	Summer	ADF	0	0	0	0	0	45	0	1160	0	0	0	0	0	0	251	0	0	0	0	0	0	1456	0	1456
May	Summer	ADM	0	0	0	0	0	0	60	20	0	0	0	0	62	0	20	0	0	0	0	0	0	162	0	162
May	Summer	ADF	0	0	0	0	0	0	0	0	0	0	0	0	0	0	0	0	0	0	0	0	0	0	0	0
May	Summer	ADF	0	100	0	0	0	0	0	0	0	0	0	0	146	0	0	0	0	50	0	0	0	196	100	296
May	Summer	ADM	0	0	0	0	0	240	0	0	0	0	0	0	0	0	0	0	0	0	0	0	0	240	0	240
May	Summer	ADF	0	0	0	0	0	0	0	0	0	0	0	0	41	0	0	0	0	0	0	0	0	41	0	41
May	Summer	ADM	0	20	0	0	0	0	0	0	0	0	0	0	0	0	0	0	0	0	0	0	0	0	20	20
May	Summer	IMM	0	0	0	0	0	160	200	0	0	0	0	0	102	0	1	0	0	0	0	0	0	463	0	463
May	Summer	ADF	0	0	0	0	0	0	0	0	0	0	0	0	0	0	0	0	0	0	0	0	0	0	0	0
May	Summer	ADF	0	0	0	0	0	0	0	0	0	0	0	0	0	0	0	0	0	0	0	0	0	0	0	0
May	Summer	ADM	0	0	0	0	0	108	106	0	0	0	0	0	0	0	0	0	0	0	0	0	0	214	0	214
May	Summer	ADM	0	0	0	0	0	0	0	0	0	0	0	0	0	0	0	0	0	0	0	0	0	0	0	0
May	Summer	ADF	0	0	0	0	0	60	20	0	0	0	0	0	0	0	0	0	0	0	0	0	0	80	0	80
May	Summer	ADF	0	0	0	0	0	71	51	0	0	46	0	0	0	0	0	0	0	0	0	0	0	168	0	168
July	Monsoon	ADM	0	0	0	0	0	0	0	0	0	0	0	0	0	0	0	0	0	0	0	40	0	40	0	40
July	Monsoon	ADF	0	0	0	0	0	0	0	0	0	0	0	0	0	0	2	0	0	0	0	40	0	42	0	42
July	Monsoon	ADF	0	0	0	0	0	0	0	0	20	0	0	0	0	0	0	0	0	0	0	60	0	80	0	80
July	Monsoon	ADF	0	0	140	0	0	0	0	0	0	0	0	0	0	0	1	0	0	0	0	0	0	1	140	141
July	Monsoon	IMM	0	0	0	0	0	0	0	0	0	0	0	0	0	0	0	0	0	0	0	20	0	20	0	20
July	Monsoon	ADF	0	0	0	0	0	0	0	0	0	0	0	0	40	0	0	0	0	0	0	0	0	40	0	40
July	Monsoon	ADM	0	0	40	0	0	0	0	0	0	0	0	0	0	0	62	0	0	0	0	0	0	62	40	102
July	Monsoon	ADF	0	0	0	0	0	0	0	0	0	0	0	0	0	0	3	0	0	0	0	0	0	3	0	3
July	Monsoon	ADF	0	0	40	0	0	0	0	0	1	0	0	0	0	0	0	0	0	0	0	0	0	1	40	41
July	Monsoon	ADF	0	0	0	0	0	0	0	0	0	0	0	0	1	0	1	0	0	0	0	0	0	2	0	2
July	Monsoon	ADF	0	0	20	0	0	0	0	0	0	0	0	0	0	0	100	0	0	0	0	0	0	100	20	120
July	Monsoon	ADM	0	0	0	0	0	0	0	0	0	0	0	0	0	0	1	0	0	0	0	0	0	1	0	1
August	Monsoon	ADF	0	0	0	0	0	0	0	0	0	0	0	0	0	0	0	0	0	0	0	0	0	0	0	0
August	Monsoon	ADF	0	0	0	0	0	0	0	0	0	0	0	0	1	0	0	0	0	0	0	0	0	1	0	1
August	Monsoon	ADF	0	0	0	0	0	0	0	0	0	0	0	0	20	0	1	0	0	0	0	0	0	21	0	21
August	Monsoon	ADM	0	0	0	0	0	0	0	0	0	0	0	0	0	0	4	0	0	0	0	0	0	4	0	4
August	Monsoon	IMM	0	0	0	0	0	0	0	0	0	0	0	0	0	0	0	0	0	0	0	0	0	0	0	0
August	Monsoon	ADM	1	0	0	0	0	0	0	0	0	0	0	0	0	0	0	0	0	0	0	0	0	0	1	1
August	Monsoon	ADM	11	0	0	0	0	20	0	0	0	0	0	0	0	0	1	0	0	0	0	0	0	21	11	32
August	Monsoon	ADF	0	0	0	0	0	0	0	0	0	0	0	0	0	0	0	0	0	0	0	0	0	0	0	0
August	Monsoon	ADF	100	23	0	0	0	0	0	0	0	0	0	0	0	0	0	0	0	20	0	0	0	20	123	143
August	Monsoon	IMM	1	0	0	0	0	0	0	0	0	0	0	0	0	0	0	0	0	0	0	0	0	0	1	1
August	Monsoon	ADF	0	0	55	0	0	0	0	0	0	0	0	0	0	0	3	0	0	0	0	0	0	3	55	58
August	Monsoon	ADM	0	0	0	0	0	0	0	0	0	0	0	0	0	0	0	0	0	0	0	0	0	0	0	0
August	Monsoon	ADF	0	0	0	0	0	0	0	0	0	0	0	0	0	0	2	0	0	0	0	0	0	2	0	2
August	Monsoon	ADF	0	2	0	0	0	0	0	0	0	0	0	0	0	0	0	0	0	0	0	0	0	0	2	2
August	Monsoon	ADM	0	0	0	0	0	0	0	0	0	0	0	0	0	0	1	0	0	0	0	0	0	1	0	1
August	Monsoon	ADF	0	0	0	0	0	0	0	0	0	0	0	0	0	0	0	0	0	0	0	0	0	0	0	0
August	Monsoon	ADF	0	0	4	0	0	0	0	0	0	0	0	0	0	0	0	0	0	0	0	0	0	0	4	4
August	Monsoon	IMM	20	0	0	0	0	0	0	0	0	0	0	0	0	0	42	0	0	0	0	0	0	42	20	62
Septenber	Monsoon	ADF	0	0	0	0	0	0	0	0	0	0	0	0	0	0	0	0	0	0	0	0	0	0	0	0
Septenber	Monsoon	IMM	20	0	0	0	0	20	0	0	0	0	0	0	0	0	0	0	0	0	0	0	0	20	20	40
Septenber	Monsoon	ADF	0	0	0	0	0	0	0	0	0	0	0	0	0	0	0	0	0	0	0	0	0	0	0	0
Septenber	Monsoon	ADM	13	0	0	0	0	0	0	0	0	0	0	0	0	0	0	0	0	0	0	20	0	20	13	33
Septenber	Monsoon	ADM	0	0	0	0	0	78	0	0	0	0	0	0	0	0	0	0	0	0	0	0	0	78	0	78
Septenber	Monsoon	ADF	4	0	0	0	0	0	0	0	0	0	0	0	0	0	21	0	0	0	0	0	0	21	4	25
Septenber	Monsoon	ADF	0	0	0	0	0	0	0	0	0	0	0	0	0	0	0	0	0	0	0	0	1	1	0	1
Septenber	Monsoon	ADF	0	0	0	0	0	0	0	0	0	0	0	0	0	0	0	0	0	0	0	0	0	0	0	0
Septenber	Monsoon	ADF	0	0	0	0	21	0	0	0	0	0	0	0	0	0	0	1	0	0	0	0	0	22	0	22
Septenber	Monsoon	ADM	0	0	0	0	0	0	0	0	0	0	0	0	0	0	1	0	0	0	0	0	0	1	0	1
Septenber	Monsoon	ADF	0	0	0	0	0	0	63	0	0	0	0	0	0	0	0	0	0	0	0	0	0	63	0	63
Septenber	Monsoon	ADF	173	0	0	0	0	0	0	0	0	0	0	0	0	0	0	0	0	0	0	0	0	0	173	173
Septenber	Monsoon	ADF	0	0	0	0	0	0	0	0	0	0	0	0	0	0	20	0	0	0	0	0	0	20	0	20
Septenber	Monsoon	ADM	0	0	0	0	0	0	0	0	0	0	0	0	0	0	0	0	0	0	0	0	0	0	0	0
Septenber	Monsoon	ADM	80	0	0	0	0	0	0	0	0	0	0	0	0	0	0	0	0	0	0	42	0	42	80	122
Septenber	Monsoon	IMM	0	0	0	0	0	0	0	0	0	0	0	0	0	0	0	0	0	0	0	0	0	0	0	0
Septenber	Monsoon	IMM	0	0	0	0	0	0	0	0	0	0	0	0	0	0	0	0	0	0	0	0	0	0	0	0
October	Winter	IMM	20	0	0	0	0	0	0	0	0	0	0	0	0	31	1	0	0	0	0	0	0	32	20	52
October	Winter	ADF	0	0	0	0	0	0	0	0	0	0	0	0	0	0	0	0	0	0	0	0	0	0	0	0
October	Winter	ADF	45	0	0	0	0	0	0	0	0	0	0	0	0	0	0	0	0	0	0	0	0	0	45	45
October	Winter	ADM	0	0	0	0	0	0	0	0	0	0	0	0	0	0	0	0	0	0	0	0	0	0	0	0
October	Winter	ADF	20	0	0	0	0	0	0	0	0	0	0	0	0	0	0	0	0	31	0	0	0	31	20	51
October	Winter	ADM	0	0	0	39	0	0	0	0	0	0	0	0	0	0	0	0	0	0	0	0	0	0	39	39
October	Winter	ADF	0	0	0	20	0	20	0	0	0	0	0	0	12	0	29	0	0	0	0	0	0	61	20	81
October	Winter	IMM	0	0	0	0	0	0	0	0	0	0	0	0	0	0	0	0	0	0	0	0	0	0	0	0
October	Winter	ADM	21	0	0	0	0	0	0	0	0	0	0	0	24	0	0	0	0	0	0	0	0	24	21	45
October	Winter	ADM	0	0	0	0	0	0	0	0	0	0	0	0	1	0	3	0	0	0	0	0	0	4	0	4
October	Winter	IMM	0	0	0	0	0	63	0	0	0	0	40	0	0	0	0	122	0	0	0	45	0	270	0	270
November	Winter	ADF	0	0	0	0	0	0	0	0	0	0	20	0	0	0	1	0	0	0	0	0	0	21	0	21
November	Winter	ADM	0	0	20	0	0	0	0	0	0	0	0	0	0	0	1	0	0	0	0	0	0	1	20	21
November	Winter	ADM	33	0	0	0	0	0	0	0	0	0	0	0	0	0	0	0	0	0	0	0	0	0	33	33
November	Winter	ADM	0	0	0	0	0	0	0	0	0	0	0	0	0	0	3	0	0	0	0	0	0	3	0	3
November	Winter	ADF	0	0	0	0	0	0	0	0	0	0	0	0	0	0	0	0	0	0	0	0	0	0	0	0
December	Winter	ADF	0	0	0	0	0	0	0	0	0	0	0	0	0	0	0	0	0	0	0	0	0	0	0	0
December	Winter	IMM	0	0	0	0	0	0	0	0	0	0	0	0	0	0	0	0	0	0	0	0	0	0	0	0
December	Winter	ADF	0	0	0	0	0	0	0	0	2	0	0	0	0	0	0	0	0	0	0	0	0	2	0	2
December	Winter	IMM	0	0	0	0	0	0	0	0	0	0	0	0	0	0	20	0	0	0	0	0	0	20	0	20
December	Winter	ADM	0	0	0	0	0	100	0	0	0	0	0	0	8	0	0	0	0	0	0	0	0	108	0	108
December	Winter	IMM	0	0	0	0	0	40	0	0	0	0	0	0	0	66	0	0	0	0	0	0	0	106	0	106
December	Winter	ADM	0	0	0	0	0	0	0	0	0	0	0	0	0	0	0	0	0	0	0	0	0	0	0	0
December	Winter	ADM	0	0	2	0	0	0	0	0	0	0	0	0	0	0	80	0	0	0	0	0	0	80	2	82
December	Winter	IMM	0	0	0	0	6	0	0	0	0	0	0	0	0	0	0	0	0	0	0	0	0	6	0	6
December	Winter	ADF	0	0	0	0	0	0	0	0	0	0	0	0	20	0	1	0	0	0	0	0	0	21	0	21
December	Winter	ADF	0	0	0	0	0	0	0	0	0	0	0	0	0	0	0	0	0	0	0	0	0	0	0	0
December	Winter	ADF	0	0	0	0	0	0	0	0	0	0	0	0	0	0	0	0	0	0	0	0	2	2	0	2
December	Winter	ADF	0	0	0	0	0	0	0	0	0	0	0	0	0	0	0	0	0	0	0	0	0	0	0	0
December	Winter	IMM	0	0	0	0	0	0	0	0	0	0	0	0	0	0	0	0	0	0	0	0	0	0	0	0
December	Winter	ADM	0	0	0	0	0	0	0	0	0	0	0	0	0	0	0	0	0	0	0	0	0	0	0	0
December	Winter	ADM	0	0	0	0	0	0	0	0	0	0	0	0	0	0	0	0	0	0	0	0	0	0	0	0
December	Winter	ADM	0	0	0	0	0	0	0	0	0	0	0	0	0	0	0	0	0	0	0	0	0	0	0	0
December	Winter	ADF	0	0	0	0	0	0	0	0	0	0	0	0	0	0	0	1	0	0	0	0	0	1	0	1
December	Winter	ADM	0	0	0	0	0	0	0	0	0	0	0	0	0	102	0	0	0	0	0	0	0	102	0	102
December	Winter	ADM	0	0	0	0	0	0	0	0	0	0	0	0	0	0	0	0	0	0	0	0	0	0	0	0
December	Winter	ADF	0	0	0	0	0	0	0	0	0	0	0	0	0	20	0	1	0	0	0	0	0	21	0	21
December	Winter	ADF	0	0	0	0	0	1	0	0	0	0	0	0	0	0	0	0	0	0	0	0	0	1	0	1
December	Winter	ADM	0	0	0	0	0	0	0	0	0	0	0	0	0	0	0	0	0	0	0	0	0	0	0	0
December	Winter	ADM	0	0	0	0	0	0	0	0	0	0	0	0	0	0	0	0	0	0	0	0	0	0	0	0
December	Winter	ADM	0	0	0	0	0	0	0	0	0	0	0	0	0	0	0	0	0	0	0	0	0	0	0	0
December	Winter	ADF	0	0	0	0	0	0	0	0	0	0	0	0	0	0	0.33	0	0	0	0	0	0	0.33	0	0.33
December	Winter	ADM	0	0	0	0	0	0	0	0	0	0	0	0	0	0	0	0	0	0	0	0	0	0	0	0
December	Winter	IMM	0	0	0	0	0	0	0	0	0	0	0	0	0	0	0	0	0	0	0	0	0	0	0	0
January	Winter	ADM	0	0	0	0	0	0	0	0	0	0	0	0	10	0	0	0	0	0	0	0	0	10	0	10
January	Winter	ADF	0	0	0	0	2	0	0	0	0	0	0	0	0	0	0	0	0	0	0	0	0	2	0	2
January	Winter	ADM	0	0	0	0	0	0	0	0	0	0	0	0	6	0	0	0	1	0	0	0	0	7	0	7
January	Winter	ADM	40	0	0	0	0	0	0	0	0	0	0	0	0	0	0	0	0	0	0	0	0	0	0	0
January	Winter	IMM	0	0	0	0	0	0	0	0	0	0	0	0	0	0	0	0	0	0	0	0	0	0	0	0
January	Winter	ADM	0	0	0	0	0	0	0	0	0	0	0	0	0	0	0	0	0	0	0	0	0	0	0	0
February	Summer	ADM	0	0	0	0	0	0	0	0	0	0	0	0	15	0	0	0	0	0	0	0	0	15	0	15
February	Summer	ADF	0	0	0	0	0	0	0	0	0	0	0	0	0	0	0	0	0	0	0	0	0	0	0	0
February	Summer	IMM	0	0	1	0	0	0	0	0	0	0	0	0	0	0	0	0	0	0	0	0	0	0	1	1
February	Summer	ADF	1	0	0	0	0	0	0	0	0	0	0	0	0	0	0	0	0	0	0	0	0	0	1	1
February	Summer	ADM	40	0	0	0	0	0	0	0	0	0	0	0	0	0	0	0	0	0	0	0	0	0	40	40
February	Summer	ADF	0	0	60	0	0	20	0	0	0	0	0	0	0	0	0	0	0	0	0	0	0	20	0	20
February	Summer	ADM	0	0	0	0	0	0	0	0	0	0	0	0	0	0	0	0	0	0	0	0	0	0	0	0
February	Summer	ADF	0	0	0	0	0	0	0	0	0	0	0	0	0	0	0	0	0	0	0	0	0	0	0	0
February	Summer	IMM	0	0	0	0	0	20	0	0	0	0	0	0	0	0	0	0	0	0	0	0	0	20	0	20
February	Summer	ADM	0	0	0	0	0	0	0	0	0	0	0	0	0	0	0	0	0	0	0	0	0	0	0	0
February	Summer	ADF	0	0	0	0	0	0	0	0	0	0	0	0	0	0	0	0	0	0	0	0	0	0	0	0
February	Summer	IMM	0	0	2	0	0	0	0	0	0	0	0	0	0	0	0	0	0	0	0	0	0	0	2	2
February	Summer	ADF	0	0	0	0	0	0	0	0	0	0	0	0	2	0	2	0	0	0	0	0	0	4	0	4
February	Summer	ADF	0	40	0	0	0	0	0	0	0	0	0	0	0	0	0	0	0	0	0	80	0	80	40	120
February	Summer	ADF	0	0	0	0	0	2	0	204	0	0	0	0	0	0	0	0	0	0	0	0	0	206	0	206
February	Summer	IMM	0	0	0	0	0	0	0	160	0	0	0	0	0	0	0	0	0	0	0	0	0	160	0	160
February	Summer	ADF	0	2	0	0	0	0	0	80	0	0	0	0	0	0	0	0	0	0	0	0	0	80	2	82
February	Summer	IMM	0	0	0	0	0	2	0	0	0	0	0	0	0	0	0	0	0	0	0	0	0	2	0	2
March	Summer	ADM	0	0	0	0	0	0	0	0	0	0	0	0	0	0	0	0	0	0	0	0	0	0	0	0
March	Summer	ADF	0	0	0	0	0	0	0	0	0	0	0	0	0	0	0	0	0	0	0	0	0	0	0	0
March	Summer	ADF	0	0	0	0	0	0	0	0	0	0	0	0	0	0	0	0	0	0	0	0	0	0	0	0
March	Summer	ADF	0	0	0	0	0	0	0	0	0	0	1	0	0	0	0	0	0	0	0	0	0	1	0	1
March	Summer	ADF	0	0	0	0	0	0	0	0	3	0	0	0	0	0	0	0	0	0	0	0	0	3	0	3
March	Summer	ADF	0	0	0	0	0	0	0	0	0	0	0	0	0	0	0	0	0	0	0	0	0	0	0	0
March	Summer	ADM	0	0	0	0	0	0	0	0	0	0	0	0	0	0	1	0	0	0	0	0	0	1	0	1
April	Summer	ADM	0	0	0	0	0	0	0	0	1	0	0	0	0	0	0	0	0	0	0	0	0	1	0	1
April	Summer	ADF	0	1	0	0	0	0	0	0	2	0	0	0	0	0	0	0	0	0	0	0	0	2	1	3
April	Summer	ADF	0	5	0	0	0	0	0	0	0	0	0	0	0	0	0	0	0	0	0	0	0	0	5	5
April	Summer	IMM	0	0	0	0	0	0	0	0	0	0	0	0	25	0	0	0	0	0	0	1	0	26	0	26
April	Summer	ADM	0	0	0	0	0	0	0	0	1	0	0	0	0	0	0	0	0	0	0	0	0	1	0	1
April	Summer	ADF	0	0	0	0	0	0	0	0	0	0	0	0	0	0	0	0	0	0	0	0	0	0	0	0
April	Summer	ADM	0	0	0	0	0	0	0	0	7	0	0	0	0	0	0	0	0	0	0	0	0	7	0	7
April	Summer	ADF	0	0	0	0	0	0	0	0	1	0	0	0	0	0	0	0	0	0	0	1	0	2	0	2
April	Summer	ADF	0	0	0	0	0	0	0	0	0	0	0	0	0	0	0	0	0	0	0	0	0	0	0	0
April	Summer	IMM	0	0	0	0	0	0	0	0	2	0	0	0	0	0	0	0	0	0	0	0	0	2	0	2
April	Summer	ADF	0	0	0	0	0	0	0	0	0	0	0	0	0	0	1	0	0	0	0	0	0	1	0	1
April	Summer	ADF	0	0	0	0	40	0	0	0	20	0	0	0	0	0	0	0	0	0	0	0	0	60	0	60
May	Summer	ADM	0	0	0	0	20	20	0	0	0	0	0	0	0	0	0	0	0	0	0	0	0	40	0	40
May	Summer	ADF	0	0	0	0	0	0	0	0	57	0	0	0	0	0	0	0	0	0	0	0	0	57	0	57
May	Summer	ADM	0	0	0	0	0	20	0	0	0	0	0	0	0	0	58	0	0	0	0	80	0	158	0	158
May	Summer	ADM	0	0	0	0	0	0	0	0	0	0	0	0	0	0	0	0	0	0	0	0	0	0	0	0
May	Summer	ADF	0	0	0	0	0	0	0	0	0	0	0	0	0	0	1	0	0	0	0	0	0	1	0	1
May	Summer	ADF	0	0	0	0	0	0	0	0	0	21	0	0	0	0	0	0	0	0	0	0	0	21	0	21
June	Monsoon	ADM	0	0	0	0	0	0	0	0	0	0	0	0	0	0	2	0	0	0	0	0	0	2	0	2
June	Monsoon	ADM	0	0	0	0	0	0	0	0	2	0	0	0	0	0	2	0	0	0	0	0	0	4	0	4
June	Monsoon	ADM	0	20	0	0	0	0	0	0	20	0	0	0	1	0	40	0	0	0	0	1	0	62	20	82
June	Monsoon	IMM	0	0	0	0	1	0	0	0	0	0	0	0	0	0	0	0	0	0	0	80	0	81	0	81
June	Monsoon	ADF	0	0	0	0	0	0	0	0	0	0	0	0	0	0	0	0	0	0	0	0	0	0	0	0
June	Monsoon	IMM	0	0	0	0	0	21	0	0	0	0	0	0	0	0	0	0	0	0	0	0	0	21	0	21
June	Monsoon	ADF	0	0	0	0	0	0	0	0	0	0	0	0	0	0	0	0	0	0	0	0	0	0	0	0
June	Monsoon	ADM	0	0	0	0	0	1	0	0	0	0	0	0	1	0	2	0	0	0	0	0	0	4	0	4
June	Monsoon	ADM	0	0	0	0	0	0	0	0	0	0	0	0	0	0	0	0	0	0	0	0	0	0	0	0
July	Monsoon	ADM	0	0	0	0	60	20	0	0	0	0	0	0	0	0	0	0	0	0	0	0	0	80	0	80
July	Monsoon	IMM	0	0	0	0	0	180	0	0	0	0	0	0	0	0	0	0	0	0	0	0	0	180	0	180
July	Monsoon	ADM	0	0	0	0	0	20	0	0	0	0	0	0	0	0	1	0	0	0	0	0	0	21	0	21
July	Monsoon	ADM	0	0	0	0	0	0	0	0	0	0	0	0	0	0	0	0	0	0	0	0	0	0	0	0
July	Monsoon	ADM	0	0	0	0	0	0	0	0	0	0	0	0	0	0	0	0	0	0	0	0	0	0	0	0
July	Monsoon	ADF	0	0	0	0	0	0	0	0	0	0	0	0	0	0	0	0	0	0	40	0	0	40	0	40
July	Monsoon	ADF	0	0	0	0	0	0	0	0	0	0	0	0	20	0	0	0	0	0	0	0	0	20	0	20
July	Monsoon	ADM	0	0	0	0	0	0	0	0	0	0	0	0	0	0	0	0	0	0	0	0	0	0	0	0
